# Supplementary material for: Facile synthesis of nitrogen and fluorine co-doped carbon materials as efficient electrocatalysts for oxygen reduction reactions in air-cathode microbial fuel cells
Source: Royal Society of Chemistry journal article supplement (doi:10.1039/c4ta06500j), 2015-01-01
Supplement: c4ta06500j1.pdf [file c4ta06500j1.pdf]

## Supporting information

Facile synthesis of nitrogen and fluorine co-doped carbon material as efficient electrocatalyst for the oxygen reduction reaction in air-cathode microbial fuel cells

Kai Meng,<sup>a,b</sup> Qin Liu,<sup>a</sup> Yiyin Huang,<sup>a</sup> and Yaobing Wang<sup>\*a</sup>

<sup>a</sup> State Key Laboratory of Structural Chemistry; Key Laboratory of design and assembly of functional nanostructures Chinese Academy of Sciences YangQiao West Road 155#, Fuzhou, 350002, P. R. China.

E-mail: wangyb@fjirsm.ac.cn

<sup>b</sup> Sichuan Agricultural University, College of Agricultural Sciences, Chengdu 611130 China.

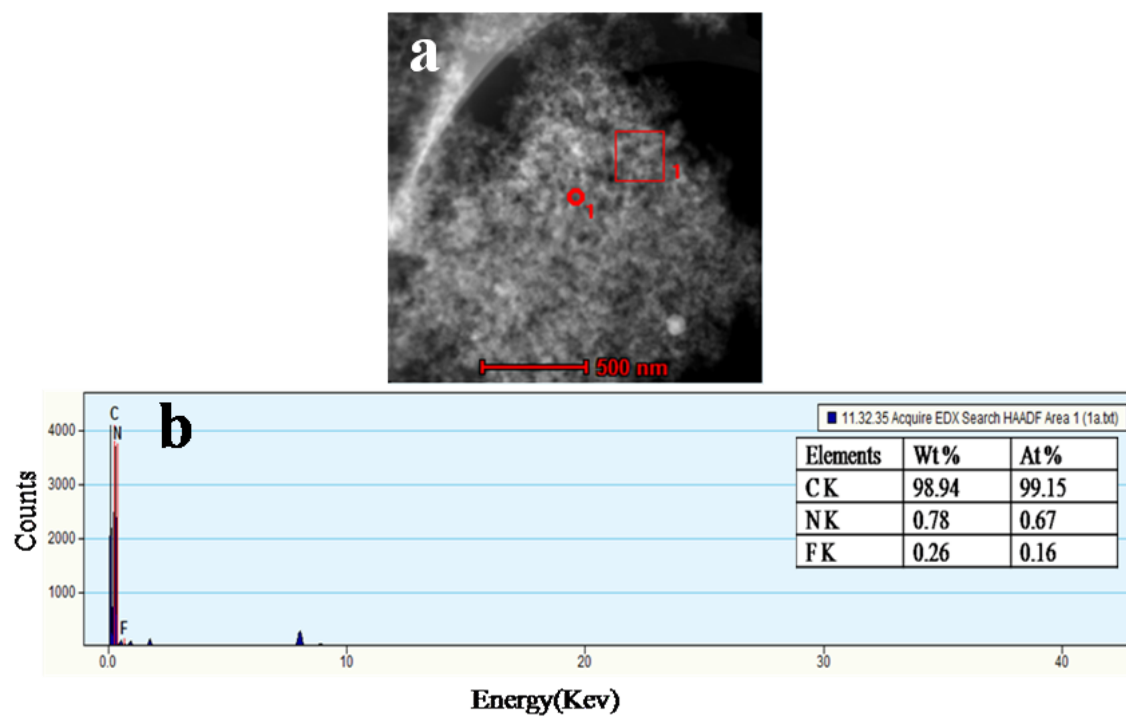

Fig.S1.TEM image (a) and EDX spectrum (b) of the as-prepared BP-NF.

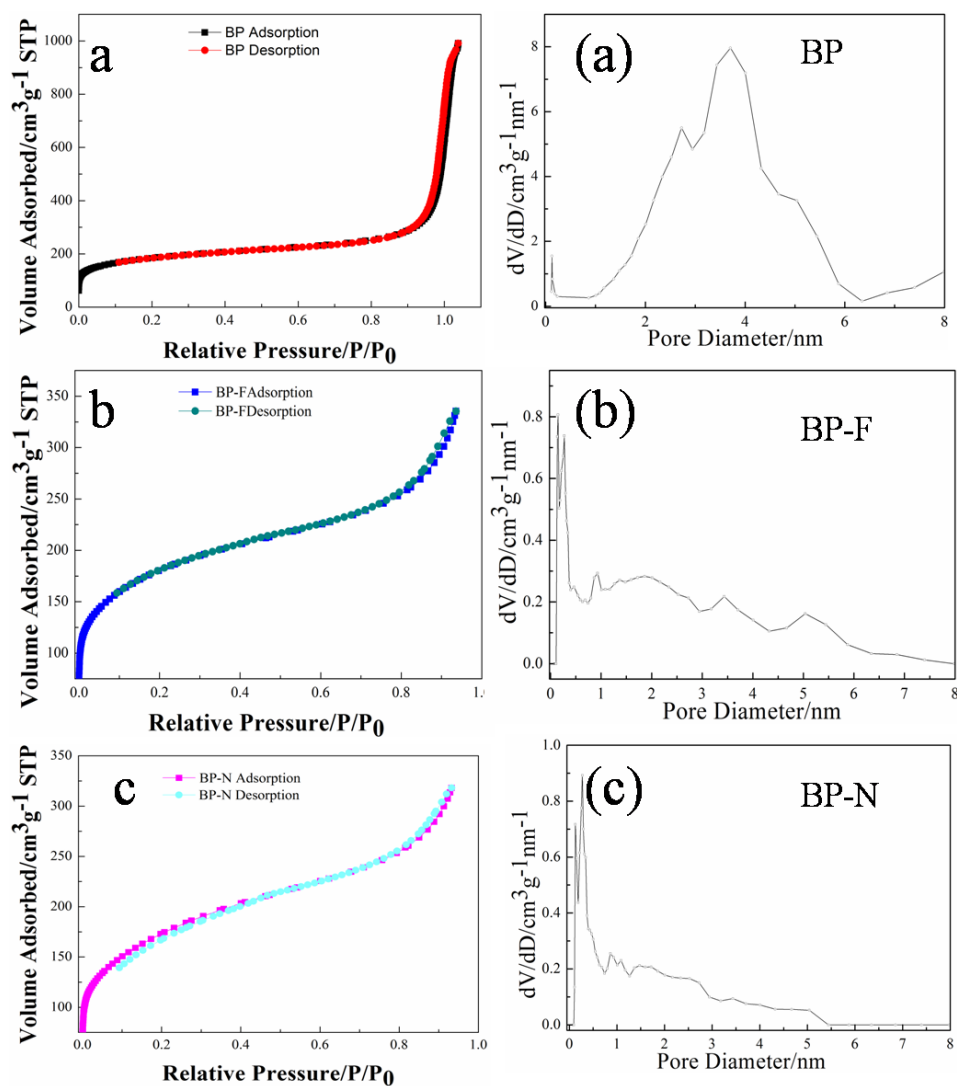

Fig.S2. N<sub>2</sub> desorption and adsorption isotherms of BP-2000 a, BP-F b and BP-N c;  
Pore size distributions of BP-2000 (a), BP-F (b) and BP-F (c).

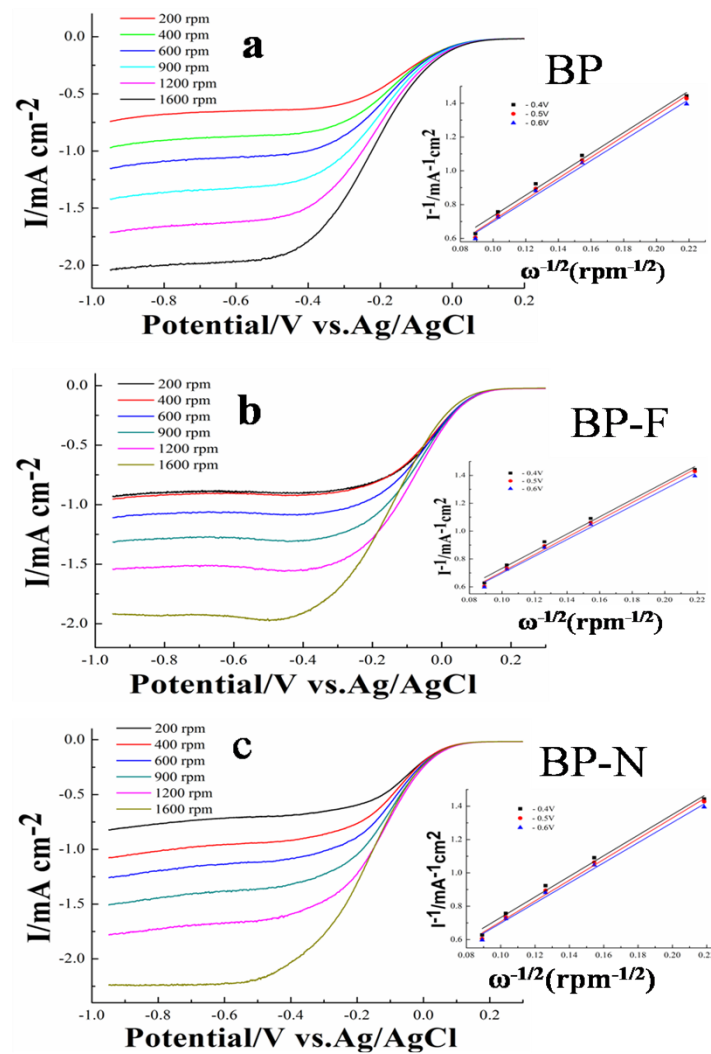

Fig.S3. LSVs for BP-2000, BP-N and BP-F in O<sub>2</sub>-stured neutral medium at various rotation speeds with scan rate of 5 mV/s. Insets: K-L plots at different potentials.
